# Supplementary material for: Phenyl- versus cyclohexyl-terminated substituents: comparative study on aggregated structures and electron-transport properties in n-type organic semiconductors
Source: Royal Society of Chemistry journal article supplement (doi:10.1039/d4me00110a), 2024-10-15
Supplement: d4me00110a1.pdf [file d4me00110a1.pdf]

## Electronic Supplementary Information

for

### **Phenyl- versus cyclohexyl-terminated substituents: Comparative study on aggregated structures and electron- transport properties in n-type organic semiconductors**

Shohei Kumagai, <sup>a,b\*</sup> Takeru Koguma, <sup>b</sup> Yutaro Arai, <sup>c</sup> Go Watanabe, <sup>d,e</sup> Hiroyuki Ishii, <sup>f</sup> Jun Takeya, <sup>b,c</sup> Toshihiro Okamoto <sup>a,b,c\*</sup>

<sup>a</sup> *Department of Chemical Science and Engineering, School of Materials and Chemical Technology, Tokyo Institute of Technology, Nagatsuta, Midori-ku, Yokohama 226-8502, Japan. E-mail: kumagai.s.am@m.titech.ac.jp; tokamoto@cap.mac.titech.ac.jp*

<sup>b</sup> *Material Innovation Research Center (MIRC) and Department of Advanced Materials Science, Graduate School of Frontier Sciences, The University of Tokyo, 5-1-5 Kashiwanoha, Kashiwa, Chiba 277-8561, Japan*

<sup>c</sup> *Department of Applied Chemistry, Graduate School of Engineering, The University of Tokyo, 7-3-1 Hongo, Bunkyo-ku, Tokyo 113-8656, Japan*

<sup>d</sup> *Department of Data Science, School of Frontier Engineering, Kitasato University, 1-15-1 Kitazato, Minami-ku, Sagami-hara, Kanagawa 252-0373, Japan*

<sup>e</sup> *Kanagawa Institute of Industrial Science and Technology (KISTEC), 705-1 Shimoimaizumi, Ebina, Kanagawa 243-0435, Japan*

<sup>f</sup> *Department of Applied Physics, Faculty of Pure and Applied Sciences, University of Tsukuba, 1-1-1 Tennodai, Tsukuba, Ibaraki 305-8573, Japan*

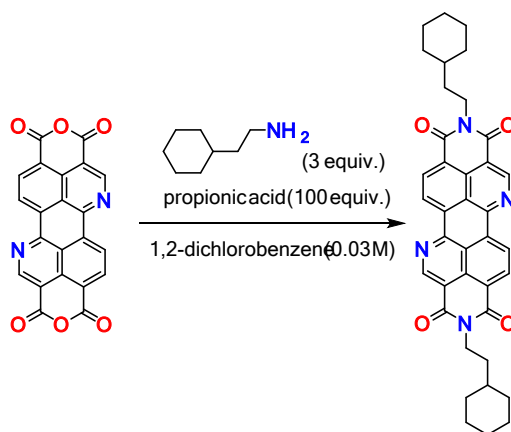

Scheme S1. Synthetic scheme for ChxC<sub>2</sub>-BQQDI.

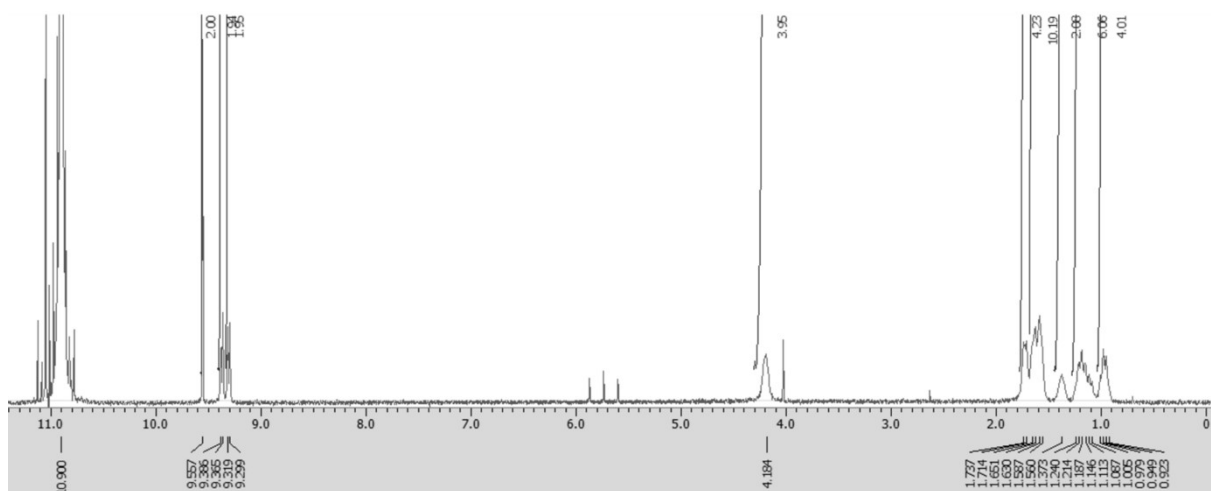

Figure S1. <sup>1</sup>H NMR spectrum of ChxC<sub>2</sub>-BQQDI (400 MHz, D<sub>2</sub>SO<sub>4</sub>, 25 °C)

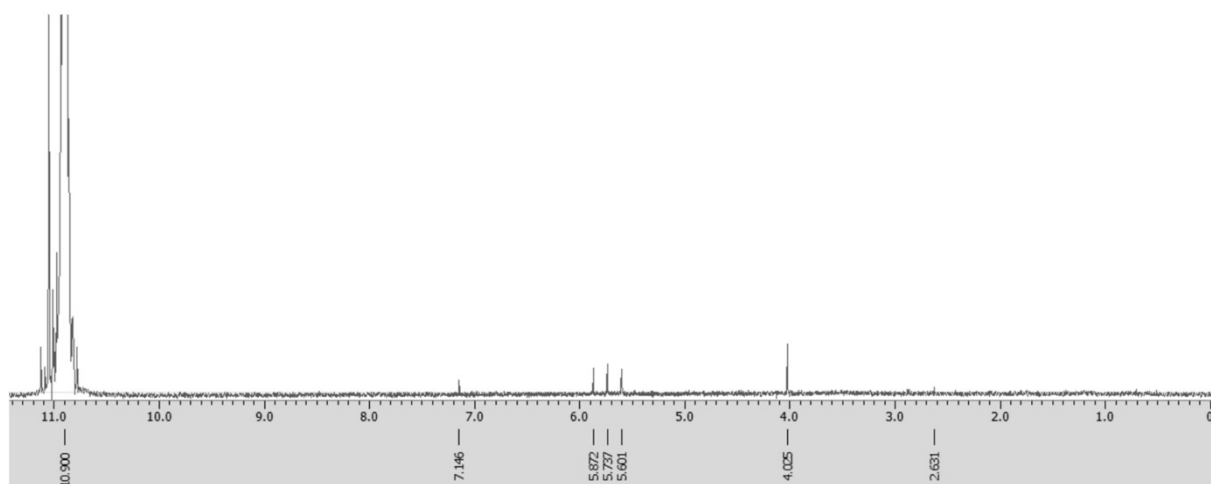

Figure S2. <sup>1</sup>H NMR spectrum of D<sub>2</sub>SO<sub>4</sub> (400 MHz, 25 °C)

Table S1. X-ray crystallographic data.

| Compound                                                                            | ChxC <sub>2</sub> -BQQDI <sup>a)</sup>                        | PhC <sub>2</sub> -BQQDI <sup>[S1]</sup>                       |
|-------------------------------------------------------------------------------------|---------------------------------------------------------------|---------------------------------------------------------------|
| Radiation type                                                                      | CuK $\alpha$                                                  | CuK $\alpha$                                                  |
| Wavelength / Å                                                                      | 1.54187                                                       | 1.54187                                                       |
| Formula                                                                             | C <sub>38</sub> H <sub>36</sub> N <sub>4</sub> O <sub>4</sub> | C <sub>38</sub> H <sub>24</sub> N <sub>4</sub> O <sub>4</sub> |
| Formula mass                                                                        | 612.71                                                        | 600.61                                                        |
| Crystal system                                                                      | Monoclinic                                                    | Monoclinic                                                    |
| Space group                                                                         | <i>P</i> 2 <sub>1</sub> / <i>n</i>                            | <i>P</i> 2 <sub>1</sub> / <i>n</i>                            |
| CCDC No.                                                                            | 2232687                                                       | 1938483                                                       |
| Crystal size / mm <sup>3</sup>                                                      | 0.460×0.054×0.005                                             | 0.700×0.047×0.005                                             |
| <i>a</i> / Å                                                                        | 4.9724(2)                                                     | 7.7048(2)                                                     |
| <i>b</i> / Å                                                                        | 7.7301(3)                                                     | 5.02249(15)                                                   |
| <i>c</i> / Å                                                                        | 38.8902(15)                                                   | 35.8104(11)                                                   |
| $\beta$ / °                                                                         | 90.514(6)                                                     | 92.467(7)                                                     |
| <i>V</i> / Å <sup>3</sup>                                                           | 1494.77(10)                                                   | 1384.48(7)                                                    |
| <i>Z</i>                                                                            | 2                                                             | 2                                                             |
| <i>T</i> / K                                                                        | 295                                                           | 296                                                           |
| $\mu$ / mm <sup>-1</sup>                                                            | 0.716                                                         | 0.771                                                         |
| $\rho_{\text{calcd}}$ / g cm <sup>-3</sup>                                          | 1.361                                                         | 1.441                                                         |
| <i>F</i> (000)                                                                      | 648                                                           | 624                                                           |
| GOF on <i>F</i> <sup>2</sup>                                                        | 1.044                                                         | 1.105                                                         |
| <i>R</i> <sub>1</sub> , <i>wR</i> <sub>2</sub> [ <i>I</i> >2 $\sigma$ ( <i>I</i> )] | 0.0847, 0.1123                                                | 0.443, 0.549                                                  |
| <i>R</i> <sub>1</sub> , <i>wR</i> <sub>2</sub> [all data]                           | 0.2171, 0.2428                                                | 0.1229, 0.1297                                                |
| Reflns. measured                                                                    | 2718                                                          | 2522                                                          |
| $\theta$ range for data collection / °                                              | 4.548– 67.687                                                 | 4.945–67.687                                                  |
| <i>R</i> <sub>int</sub>                                                             | 0.1016                                                        | 0.0289                                                        |

$$R = \Sigma(|F_o| - |F_c|) / \Sigma|F_o|$$

$$R_w = [\Sigma w(|F_o| - |F_c|)^2 / \Sigma w|F_o|^2]^{1/2}$$

$$^a) w = 1 / [s^2(F_o^2) + (0.1530P)^2 + 0.2104P], \text{ where } P = (F_o^2 + 2F_c^2) / 3$$

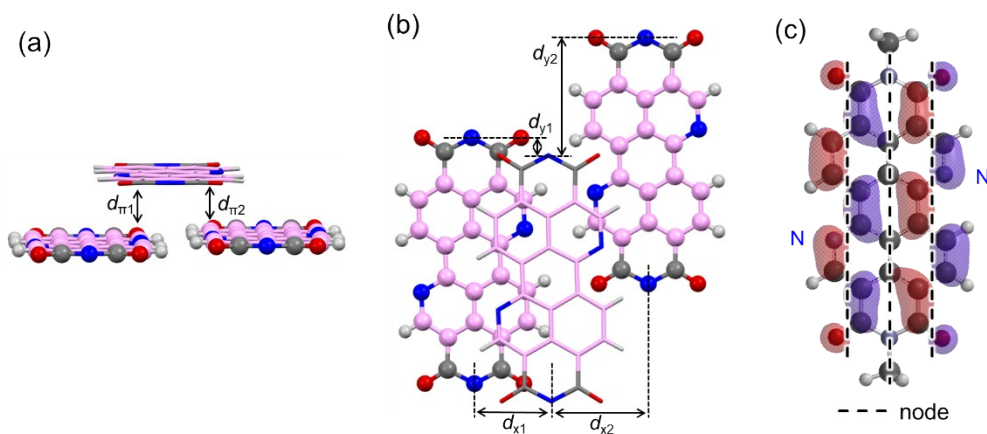

Figure S3 (a, b) Definition of  $d_x$ ,  $d_y$  and  $d_\pi$ . C atoms in the BQQ moiety are colored by pink. (c) LUMO of methyl-substituted BQQDI calculated at the B3LYP/6-31+G(d) level of DFT.

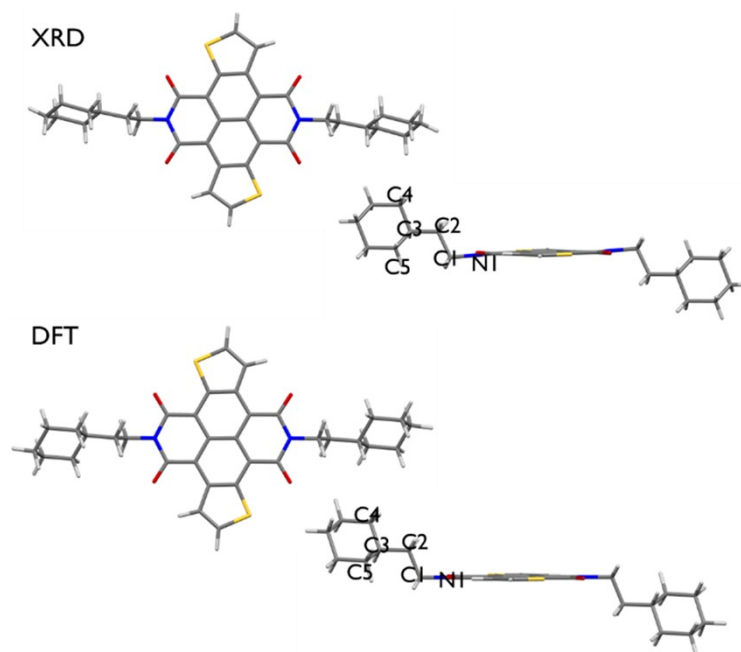

Figure S4 Single molecular geometries of *N,N'*-bis(2-cyclohexylethyl)naphtho[2,3-*b*:6,7-*b'*]dithiophene-4,5,9,10-tetracarboxylic acid diimide.<sup>S2</sup>

Table S2. Summary of bond and torsion angles of *N,N'*-bis(2-cyclohexylethyl)naphtho[2,3-*b*:6,7-*b'*]dithiophene-4,5,9,10-tetracarboxylic acid diimide.

|                                                   | XRD   | DFT   |
|---------------------------------------------------|-------|-------|
| Bond angle<br>$\angle(\text{N1-C1-C2})$ (°)       | 111.1 | 112.1 |
| Bond angle<br>$\angle(\text{C1-C2-C3})$ (°)       | 116.1 | 113.7 |
| Torsion angle<br>$\angle(\text{N1-C1-C2-C3})$ (°) | 11.4  | 4.7   |
| Torsion angle<br>$\angle(\text{C1-C2-C3-C4})$ (°) | 1.6   | 10.0  |
| Torsion angle<br>$\angle(\text{C1-C2-C3-C5})$ (°) | 44.1  | 66.1  |

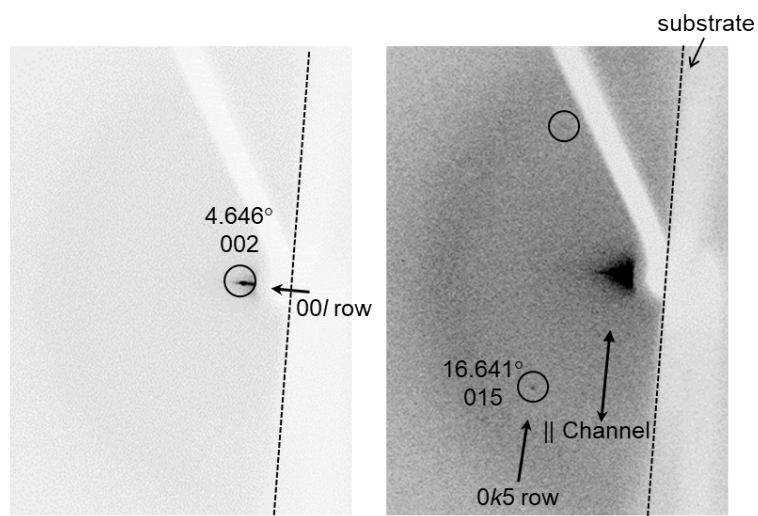

Figure S5 X-ray diffraction images of the single-crystal  $\text{ChxC}_2\text{-BQQDI}$  OTFT. X-ray was irradiated nearly parallel to the substrate. Two images are the same data shown by different contrasts.

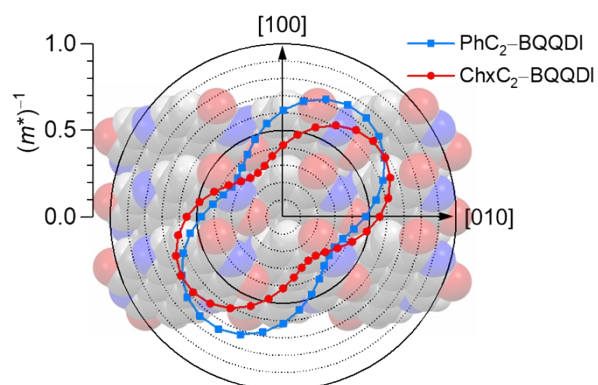

Figure S6 Azimuthal plot of the inverse of effective mass of electrons  $(m^*)^{-1}$  in the  $ab$  plane. Image behind the plot shows the corresponding packing structure of  $\text{ChxC}_2\text{-BQQDI}$  (2-cyclohexylethyl substituents are omitted for clarity).

Table S3. Initial parameters for MD simulations.

| Compound          | ChxC <sub>2</sub> -BQQDI | PhC <sub>2</sub> -BQQDI |
|-------------------|--------------------------|-------------------------|
| Num. of molecules | 600                      | 600                     |
| Temperature (K)   | 295                      | 296                     |
| Crystal system    | Monoclinic               | Monoclinic              |
| Space group       | <i>P2<sub>1</sub>/n</i>  | <i>P2<sub>1</sub>/n</i> |
| <i>a</i> (nm)     | 4.9724                   | 7.7048                  |
| <i>b</i> (nm)     | 7.7301                   | 5.0225                  |
| <i>c</i> (nm)     | 11.6671                  | 10.7431                 |
| $\alpha$ (°)      | 90                       | 90                      |
| $\beta$ (°)       | 90.51                    | 92.47                   |
| $\gamma$ (°)      | 90                       | 90                      |

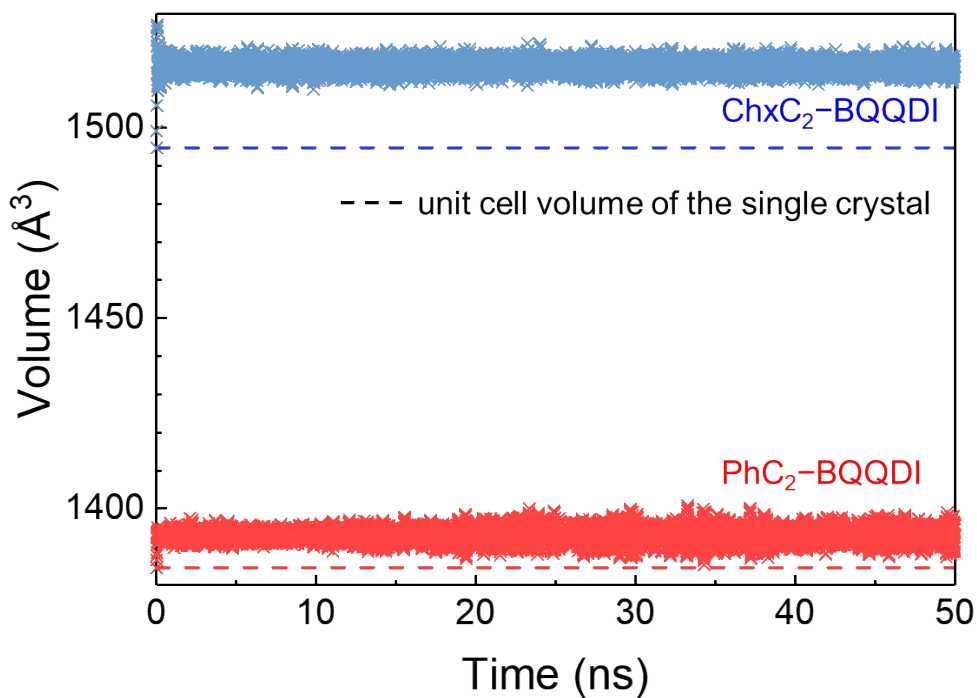

Figure S7 Time trace of the unit cell volume during the NTP run. The volume is corrected from the  $10 \times 10 \times 3$  supercell volume for MD simulations to a reduced cell volume corresponding to the dimensions of single crystal data. The average volume for the last 20 ns of 50 ns MD runs is  $1393.0 \pm 2.0$  and  $1516.1 \pm 1.6 \text{ \AA}^3$  for PhC<sub>2</sub>-BQQDI and ChxC<sub>2</sub>-BQQDI, respectively.

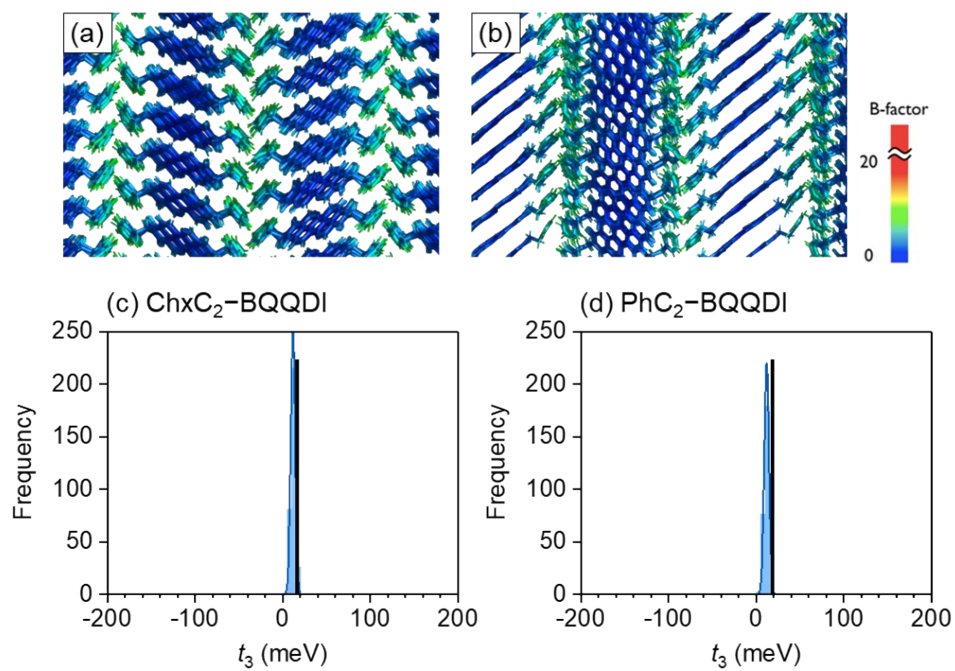

Figure S8 Additional results of MD simulation. (a, b) Color-coded  $B$ -factor distribution (unit:  $\text{\AA}^2$ ) obtained from the trajectory of the crystal structure of PhC<sub>2</sub>-BQQDI during the last 10 ns of 100 ns MD runs at 296 K. (c, d) Histogram of  $t_3$  for (c) ChxC<sub>2</sub>-BQQDI and (d) PhC<sub>2</sub>-BQQDI.



Table S4. Summary of transfer integrals based on crystal structure and MD simulation.

|                          | $t$ (meV) <sup>a)</sup> | $t_{\text{avg}}$ (meV) <sup>b)</sup> | $\sigma$ (meV) <sup>b)</sup> | $\sigma/t_{\text{avg}}$ |
|--------------------------|-------------------------|--------------------------------------|------------------------------|-------------------------|
| ChxC <sub>2</sub> -BQQDI |                         |                                      |                              |                         |
| $t_1$                    | +82.1                   | +71.6                                | 27.2                         | 0.38                    |
| $t_2$                    | +53.8                   | +37.8                                | 15.3                         | 0.41                    |
| $t_3$                    | +18.2                   | +11.6                                | 2.6                          | 0.22                    |
| PhC <sub>2</sub> -BQQDI  |                         |                                      |                              |                         |
| $t_1$                    | +90.7                   | +82.7                                | 26.4                         | 0.32                    |
| $t_2$                    | +58.5                   | +40.8                                | 14.7                         | 0.36                    |
| $t_3$                    | +18.9                   | +11.8                                | 2.7                          | 0.23                    |

<sup>a)</sup> Calculated based on the crystallographic data. <sup>b)</sup> Calculated based on MD simulations.

#### References in the Supplementary Information

**S1** T. Okamoto, S. Kumagai, E. Fukuzaki, H. Ishii, G. Watanabe, N. Niitsu, T. Annaka, M. Yamagishi, Y. Tani, H. Sugiura, T. Watanabe, S. Watanabe and J. Takeya, *Sci. Adv.*, 2020, **6**, eaaz0632.

**S2** M. Nakano, D. Hashizume and K. Takimiya, *Molecules*, 2016, **21**, 981.
